# Supplementary material
Source: publisher site journal article supplement (https://thieme-connect.com/media/10.1055-s-00035024/201709/supmat/10-1160-th17-02-0081-supp.pdf)
Supplement: Supplementary file 1 [file 10-1160-th17-02-0081-supp.pdf]

**Supplementary Material to  
Kara et al. “Analysis of the  
substrate specificity of Factor  
VII activating protease (FSAP)  
and design of specific and  
sensitive peptide substrates”**

**(<https://doi.org/10.1160/TH17-02-0087>)**

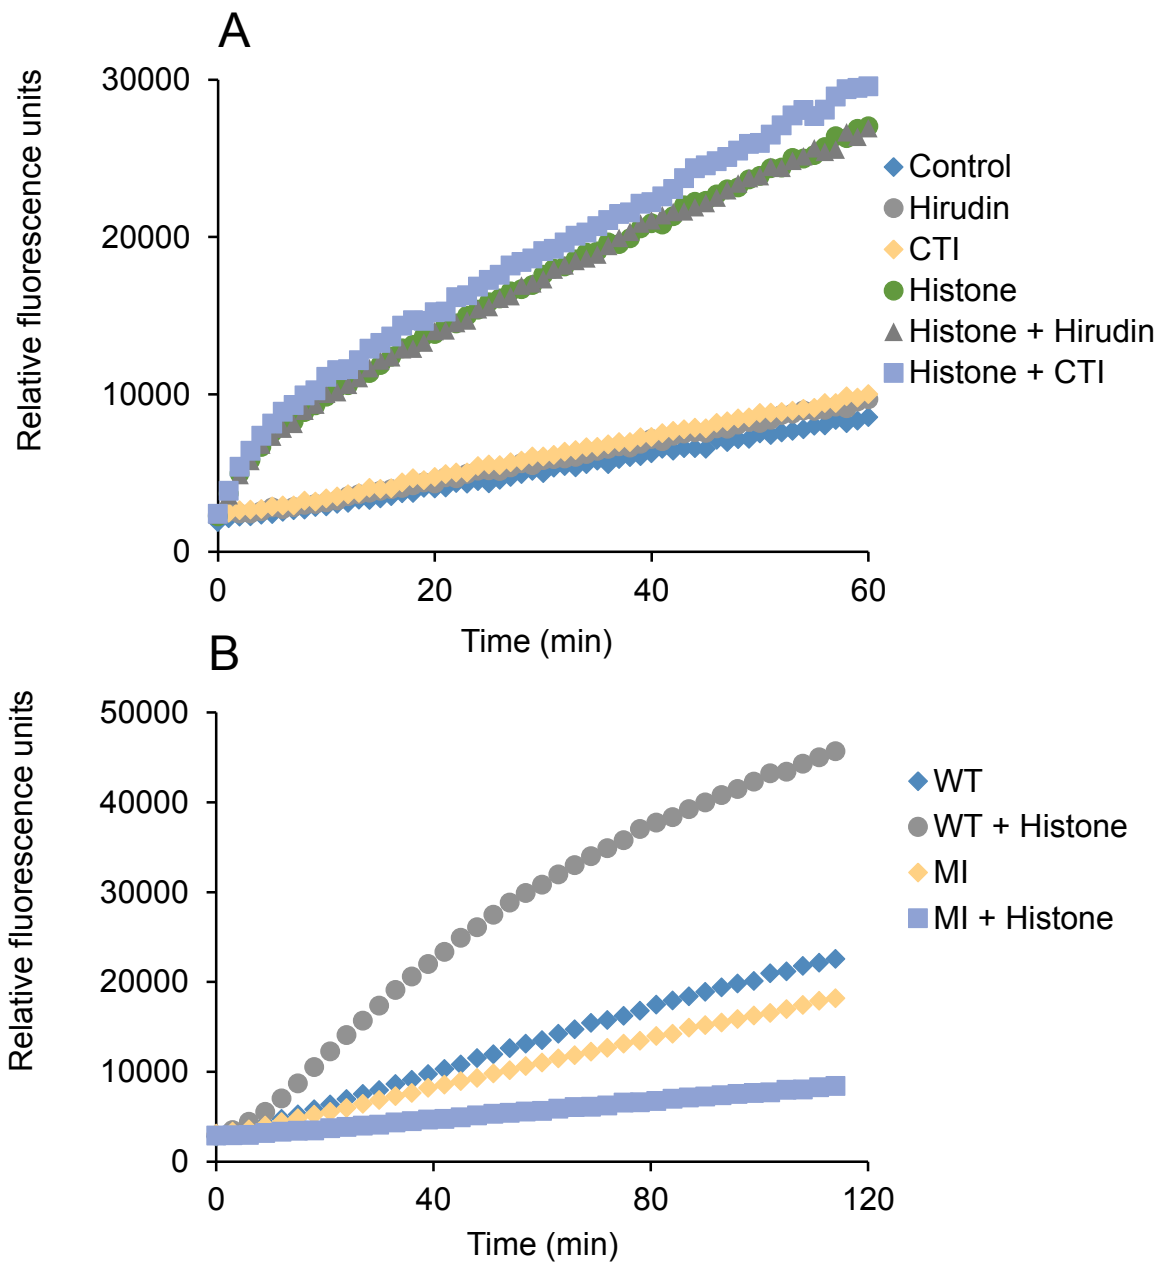

**Suppl. Figure 1: Determination of pro-FSAP activation in plasma:** (A) Normal human citrate plasma (1:5 dilution) was incubated with corn trypsin inhibitor (CTI, 50  $\mu\text{g}/\text{ml}$ ) or lepirudin (25  $\mu\text{g}/\text{ml}$ ) in the absence or presence of histones (20  $\mu\text{g}/\text{ml}$ ). Ala-Lys-Nle-Arg-AMC substrate (40  $\mu\text{M}$ ) was added and the proteolytic activity was monitored at 37°C as relative fluorescence units. (B) Same conditions as above except that normal plasma was compared to plasma from a subject homozygous for the MI-SNP. Experiments were performed in duplicate.

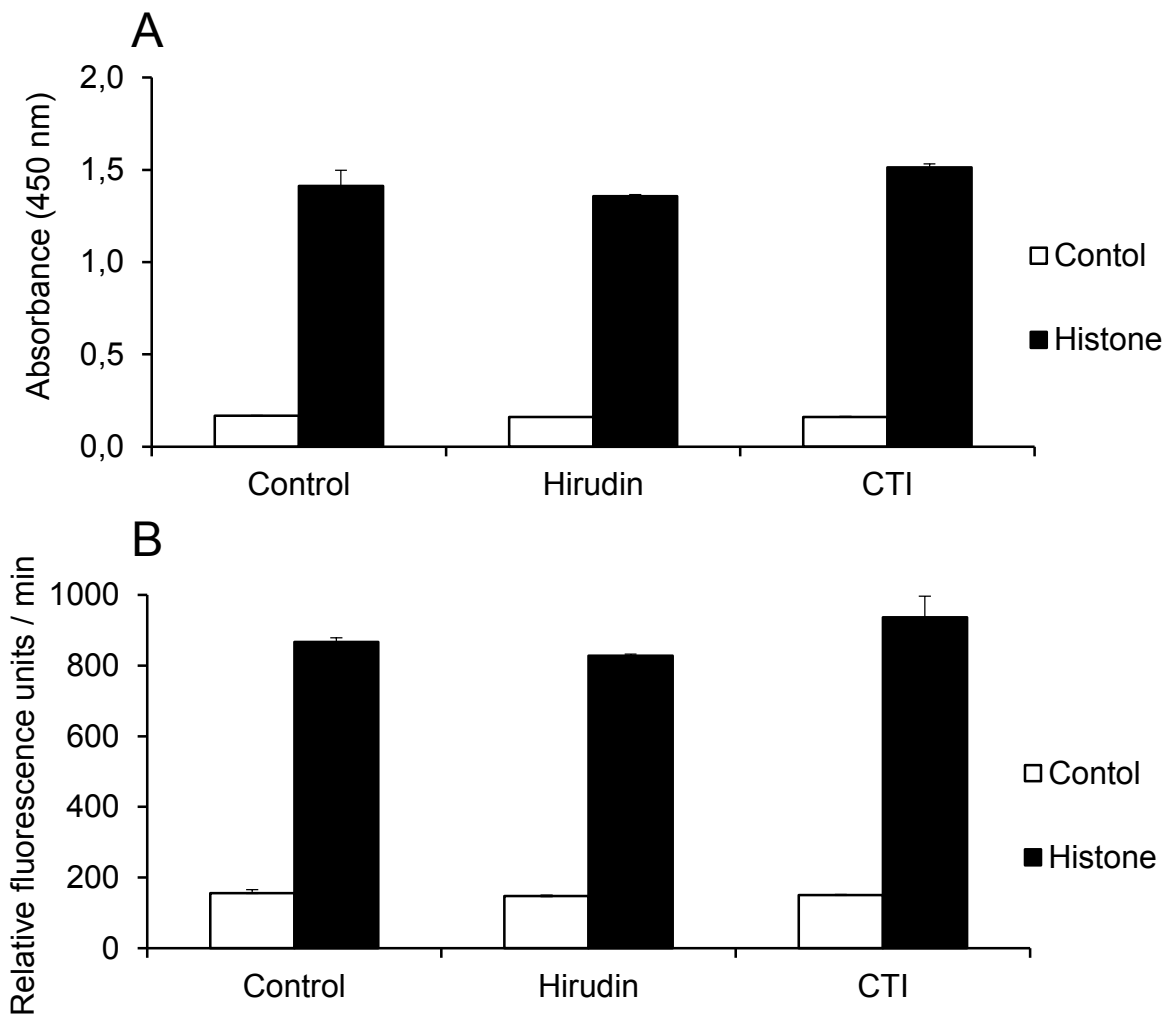

**Suppl. Figure 2: Determination of FSAP activation in plasma using FSAP:  $\alpha$ 2 anti-plasmin complex as well as fluorescent peptide turnover:** (A) Normal human citrate plasma (1:5 dilution) was incubated with corn trypsin inhibitor (CTI, 40  $\mu$ g/ml) or lepirudin (12.5  $\mu$ g/ml) in the absence or presence of histones (20  $\mu$ g/ml) for 60 min at 37°C. FSAP:  $\alpha$ 2 anti-plasmin complexes were determined using an ELISA. (B) To plasma samples prepared as above Ala-Lys-Nle-Arg-AMC substrate (40  $\mu$ M) was added and the proteolytic activity was monitored at 37°C as relative fluorescence units/ min. Experiments were performed in duplicate and are shown as mean  $\pm$  SD.

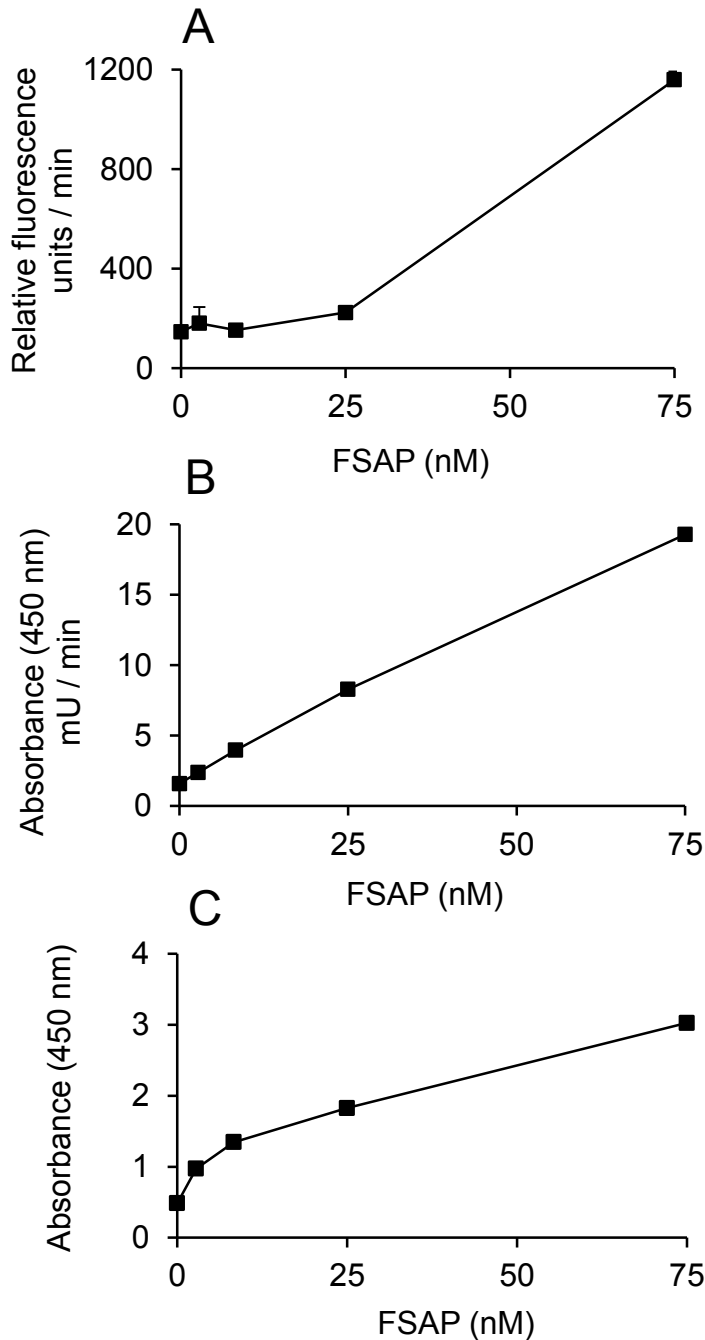

**Suppl. Figure 3: Comparison of different assays to measure FSAP activity in plasma:** Defined amounts of purified FSAP (0-75 nM) was added to FSAP-deficient plasma for 30 min at 37°C. (A) To these plasma samples Ala-Leu-Lys-Arg-AMC substrate (40  $\mu$ M) was added and the proteolytic activity was monitored at 37°C as relative fluorescence units/min. (B) Plasma samples were added to FSAP-antibody coated wells to immunocapture FSAP. Activation of pro-uPA turnover was determined by using a chromogenic uPA substrate. (C) FSAP:  $\alpha$ 2 anti-plasmin complexes were determined using an ELISA. Experiments were performed in duplicate and are shown as mean  $\pm$  SD.
